# Supplementary material
Source: publisher figshare collection journal article supplement (https://frontiersin.figshare.com/ndownloader/files/24832490)
Supplement: Supplementary file 1 [file 24832490]

Supplementary Material


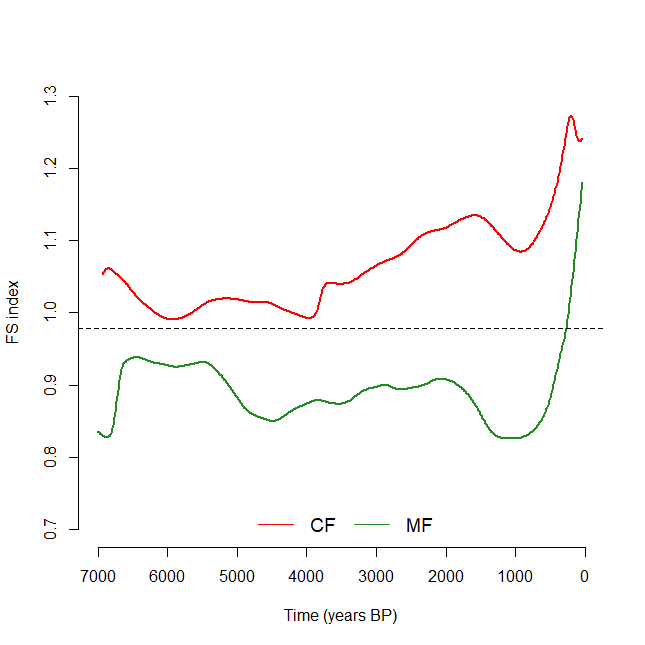


# Supplementary Figure 4. Changes in average Fire Size index (FS-index) computed from lacustrine charcoal over the last 7000 years in the mixedwood (green) and coniferous (red) boreal forests of western Quebec. The dashed black line represents the Holocene average FS-index for the entire study area encompassing both the mixedwood and coniferous boreal forests.
